# Supplementary material for: A novel enzymatic method for synthesis of glycopeptides carrying natural eukaryotic N-glycans
Source: Royal Society of Chemistry journal article supplement (doi:10.1039/c7cc04362g), 2017-01-01
Supplement: c7cc04362g1.pdf [file c7cc04362g1.pdf]

## Supplementary information

### A novel enzymatic method for synthesis of glycopeptides carrying natural eukaryotic *N*-glycans

Yangyang Xu,<sup>a#</sup> Zhigang Wu,<sup>b#</sup> Peiru Zhang,<sup>a</sup> He Zhu,<sup>b</sup> Hailiang Zhu,<sup>b</sup> Qitao Song,<sup>a</sup> Li Wang,<sup>a</sup> Faxing Wang,<sup>a</sup> Peng George Wang<sup>a\*</sup> and Jiansong Cheng<sup>a\*</sup>

<sup>a</sup>State Key Laboratory of Medicinal Chemical Biology and College of Pharmacy, Nankai University, Haihe Education Park, 38 Tongyan Road, Tianjin 300353, P. R. China.

<sup>b</sup>Department of Chemistry, Georgia State University, Atlanta, Georgia 30303, United States.

## Experimental procedure

### General Information

Ac-CoA (>93%, CAS:102029-73-2) was purchased from Sigma-Aldrich (St. Louis, MO, USA). UDP-GlcNAc (98%, CAS:91183-98-1) and UDP-GalNAc (95%, CAS:108320-87-2) were purchased from J&K (Beijing, China). <sup>1</sup>H NMR spectra was recorded on a Bruker AV 400 MHz spectrometer at 400 MHz. High resolution mass spectra were performed on a 6520Q-TOF LC/MS instrument (Agilent) with ES ionization. MALDI-TOF MS were obtained with an Autoflex Speed mass spectrometer (Bruker) or a Varian 7.0T FTMS instrument using 2,5-dihydroxybenzoic acid (DHB) as matrix. Nano UHPLC-MS/MS assays were obtained on an LTQ-Orbitrap Elite mass spectrometer (Thermo Fisher). Reverse-phase HPLC was performed on a Shimadzu SPD-20A instrument using a Shim-pack VP-ODS C18 column (5 μm, 4.6 mm × 250 mm).

### Synthesis of UDP-GlcN, UDP-GlcN<sub>3</sub> and UDP-GalN

The method for synthesis of UDP-GlcN, UDP-GlcN<sub>3</sub> and UDP-GalN were described previously.<sup>1,2</sup> For UDP-GlcN, reaction was monitored by Thin Layer Chromatography (TLC) on silica gel F254 (Merck), developed by isopropanol/NH<sub>4</sub>OH=3:2(V/V), then stained with p-anisaldehyde solution (ethanol/sulfuric acid/p-anisaldehyde/aceticacid = 500:27:16:5.5, V/V/V/V). The crude products were purified by silica gel chromatography (isopropanol/

NH<sub>4</sub>OH=3:1) and Bio-Gel P2 size exclusion chromatography to obtain pure UDP-GlcN (500 mg, 53%). <sup>1</sup>H NMR (400 MHz, D<sub>2</sub>O) δ 7.88 (d, *J* = 8.1 Hz, 1H), 5.94–5.85 (m, 2H), 5.79 (dd, *J* = 6.9, 3.4 Hz, 1H), 4.32–4.27 (m, 2H), 4.24–4.10 (m, 3H), 3.93–3.82 (m, 2H), 3.82–3.71 (m, 2H), 3.50 (t, *J* = 9.6 Hz, 1H), 3.34 (dt, *J* = 10.8, 3.1 Hz, 1H). HRMS (ESI): calculated for C<sub>15</sub>H<sub>26</sub>N<sub>3</sub>O<sub>16</sub>P<sub>2</sub>: 566.0788, found (*m/z*): [M+H]<sup>+</sup> = 566.0777.

### **Protein expression and purification**

The *N*-Glycosyltransferase ApNGT<sup>Q469A</sup> and the glucosamine/glucosaminide *N*-acetyltransferase GlmA were cloned into pET22b and pET15b, respectively. The *Escherichia coli* BL21 (DE3) strains harboring the corresponding expression plasmids, were cultured in LB medium supplemented with ampicillin (50 μg mL<sup>-1</sup>) under energetic shaking. When the optical density at 600 nm (OD<sub>600</sub>) reached 0.8, 0.1 mM of isopropyl-1-thio-β-D-galactopyranoside (IPTG) was supplied and followed by incubating at 16°C for 18 h. The cells were harvested by centrifugation (6,000×g, 4°C, 20 mins), and resuspended in lysis buffer (100 mM Tris-HCl, 5 mM CaCl<sub>2</sub>, pH 8.0), and broken by ultrasonication. After centrifugation (14,000×g, 20 mins) of the cell lysate, the supernatant was loaded onto a Ni<sup>2+</sup>-NTA affinity column (Qiagen). The column was pre-equilibrated with 10 column volumes of binding buffer (10 mM imidazole, 0.5 M NaCl, 20 mM Tris-HCl, pH 8.0) before the lysate was loaded. After washing with 10 column volumes of binding buffer and washing buffer (30 mM imidazole, 0.5 M NaCl, 5 mM CaCl<sub>2</sub>, 20 mM Tris-HCl, pH 8.0), the target protein was eluted with elution buffer (250 mM imidazole, 0.5 M NaCl, 5 mM CaCl<sub>2</sub>, 20 mM Tris-HCl, pH 8.0). Elution fractions were analyzed by 12% SDS-PAGE with Coomassie staining. The concentration of purified enzyme was quantified by the BCA Protein Assay Kit (Pierce Biotechnology, Rockford, IL) with bovine serum albumin as a protein standard.

### **Enzymatic reactions**

#### **(1) Synthesis of GlcN-peptides**

Production of GlcN-peptides were carried out in the volume of 20 ml contains 20 μM ApNGT, 10 mM UDP-GlcN (20 mM UDP-GlcN for peptide P15), 1 mM various peptides and with 100 mM Tris-HCl (pH8.0) at 30°C for overnight with a slight shaker. Reactions were stopped by boiling 5 mins and then analyzed by Shim-pack VP-ODS C18 column (5 μm, 4.6 mm × 250 mm) and purified through HYPERSIL GOLD C18 column (10 μm, 10 mm × 250 mm). The purified GlcN-peptides were further identified by HPLC and MALDI-TOF MS.

#### **(2) Synthesis of GlcNAc-peptides**

For synthesis of GlcNAc-peptides, 10 μM GlmA, 2 mM Ac-CoA (4 mM Ac-CoA for peptide P16), 1 mM various GlcN-peptides with 100 mM Tris-HCl (pH7.5) were mixed at 37°C for 2

hours. Reactions were stopped by boiling 5 mins and then analyzed and purified by HPLC. The purified GlcNAc-peptides were further identified by MALDI-TOF MS and ESI-MS-MS analysis. MALDI-TOF: calculated  $M=1239.598$ ; found ( $m/z$ ):  $[M+Na]^+=1262.028$ . The purified GGAN(GlcNAc)LYTYIE was identified by  $^1H$ -NMR.  $^1H$ -NMR (400 MHz,  $D_2O$ , selected signals):  $\delta$  6.99 (d,  $J = 8.52$  Hz, 2H, 2×Tyr Aromatic), 6.69 (d,  $J = 8.52$  Hz, 2H, 2×Tyr Aromatic), 4.93 (d,  $J = 9.80$  Hz, 1H, H-1  $\beta$ -GlcNAc), 4.56 (q,  $J = 7.55$  Hz, 2H), 4.27-4.19 (m, 4H), 4.16 (d,  $J = 4.96$  Hz, 1H), 4.05-3.95 (m, 3H), 3.90 (d,  $J = 2.56$  Hz, 2H), 3.7744 (s, 2H), 3.75-3.74 (m, 2H), 3.64-3.60 (m, 1H), 3.50-3.46 (m, 1H), 3.36 (d,  $J = 5.64$  Hz, 2H), 2.94 (dd,  $J = 6.36$  Hz,  $J = 12.24$  Hz, 1H), 2.86-2.74 (m, 2H), 2.62 (dd,  $J = 7.56$  Hz,  $J = 15.9$  Hz, 1H), 2.36-2.32 (m, 2H), 2.04-1.96 (m, 1H), 1.89 (s, 3H, 3×Ac GlcNAc), 1.86-1.81 (m, 1H), 1.79-1.72 (m, 1H), 1.54-1.34 (m, 4H), 1.26 (d,  $J = 7.0$  Hz, 3H), 1.12-1.06 (m, 1H), 1.02 (d,  $J = 6.32$  Hz, 6H), 0.81-0.73 (m, 12H).

### **(3) Synthesis of N-Glycan-peptides**

The reaction mixtures contained 50 mM PBS (pH 6.5), 5 nM GlcNAc-peptide as acceptor, 20 nM sialylated complex-type glycans oxazoline (SCT-oxa) as donor, and 20  $\mu$ g Endo M<sup>N175Q</sup>, and was incubated at 30°C for 15 mins. After optimization of reaction condition for EndoM<sup>N175Q</sup>, we chose to carry out 15 mins incubation for peptide transglycosylation. The reaction was terminated by boiling 5 mins and then analyzed by HPLC-C18 and ESI-MS.

#### **Method of Electrospray ionization tandem mass spectrometry**

GlcNAc-peptides were analyzed using Nano RP-HPLC-MS system as described before.<sup>3</sup> Briefly, samples were separated on EASY-Spray PepMap C18 Column (75  $\mu$ m id  $\times$  15 cm, 3  $\mu$ m) with an LTQ-Orbitrap Elite mass spectrometer using a linear gradient from 3% to 40% buffer B for 40 mins at a flow rate of 300 nL/min (mobile phase A: 1.95% ACN, 97.95%  $H_2O$ , 0.1% FA; mobile phase B: 79.95% ACN, 19.95%  $H_2O$ , 0.1% FA). Data-dependent mode was applied during the acquisition. A full-scan survey MS ( $m/z$  range from 400 to 2000; automatic gain control target, 1,000,000 ions; resolution at 200  $m/z$ , 60,000; maximum ion accumulation time, 50 ms) was acquired by the spectrometer, and ten most intense ions were selected for HCD fragmentation with a collision energy of 27 eV.

#### **Circular dichroism (CD) spectroscopy**

Far-UV (190–260 nm) CD spectra was recorded on a J-810 spectropolarimeter (Jasco) at ambient temperature (25°C) using a 0.1-cm-pathlength quartz cuvette. The measurements of 50  $\mu$ M mGLP-1 and GlcNAc-mGLP-1 were carried out in 10 mM PBS Buffer (pH 6.5). All spectra presented were averaged for 3 scans.

**Table S1.** Apparent kinetic parameters of ApNGT<sup>Q469A</sup> and GlmA

| Enzymes | Substrates        | $K_m$<br>( $\mu\text{M}$ ) | $V_{\text{max}}$<br>( $\mu\text{M}\cdot\text{min}^{-1}$ ) | $k_{\text{cat}}$<br>( $\text{S}^{-1}$ ) | $k_{\text{cat}}/K_m$<br>( $\text{M}^{-1}\cdot\text{S}^{-1}$ ) |
|---------|-------------------|----------------------------|-----------------------------------------------------------|-----------------------------------------|---------------------------------------------------------------|
| Q469A   | GGANLTYTIER       | $(1.7\pm 0.2)\times 10^3$  | $3.8\pm 0.2$                                              | $6.3\times 10^{-3}$                     | 3.7                                                           |
|         | UDP-GlcN          | $(5.0\pm 0.3)\times 10^3$  | $2.1\pm 0.1$                                              | $3.5\times 10^{-3}$                     | 0.7                                                           |
| GlmA    | GGAN(GlcN)LTYTIER | $(9.8\pm 0.9)\times 10^2$  | $11.4\pm 0.5$                                             | $9.5\times 10^{-2}$                     | 96.9                                                          |
|         | Ac-CoA            | $19.9\pm 2.9$              | $2.6\pm 0.1$                                              | $2.2\times 10^{-2}$                     | $1.1\times 10^3$                                              |

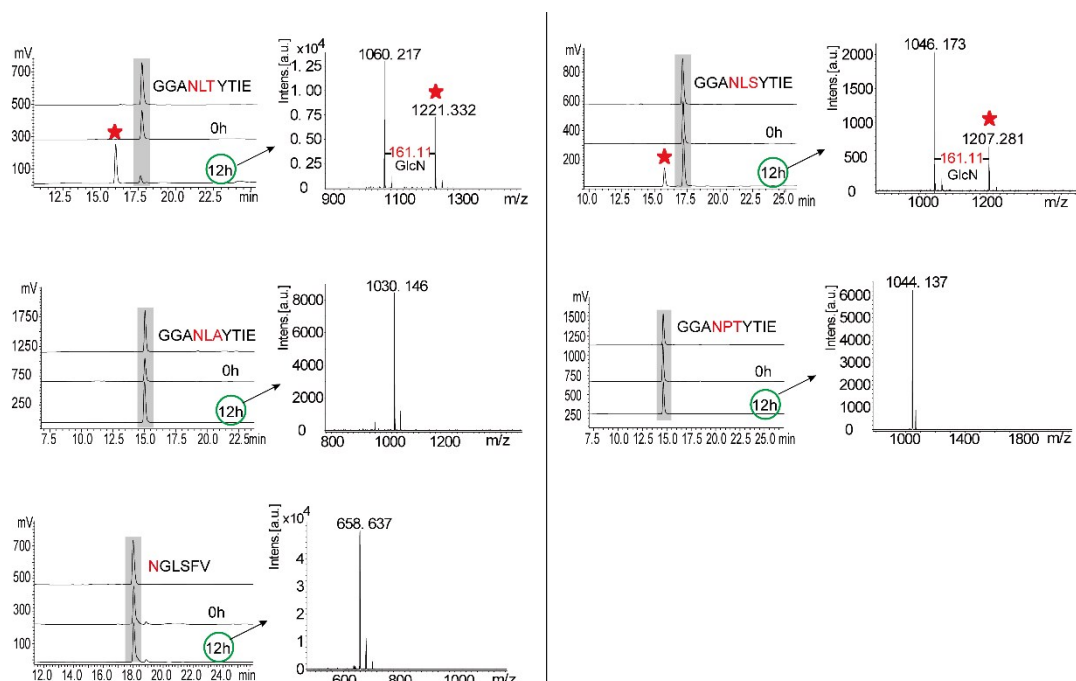**Fig. S1** The specificity of ApNGT<sup>Q469A</sup> toward peptides. The reactions catalyzed by ApNGT<sup>Q469A</sup> for 12 h were monitored by HPLC. The glycosylated peptides were confirmed by MALDI-TOF MS and labeled with red stars.

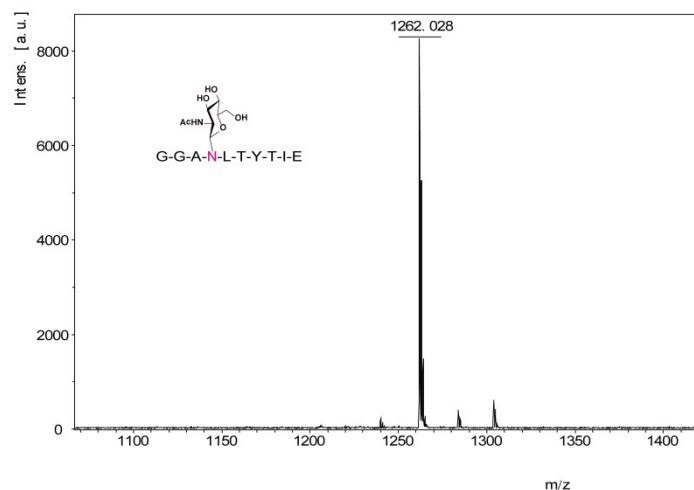

**Fig. S2.** MALDI-TOF MS profile of GGAN(GlcNAc)LTYTIE, calculated  $M=1239.598$ ; found( $m/z$ ):  $[M+Na]^+ = 1262.028$ .

**Fig. S3.** HCD-MS2 spectra of glycopeptides GlcNAc-P11~GlcNAc-P19

GlcNAc-peptides were confirmed by the HCD spectrums with a series of diagnosis fragmentation ions for GlcNAc including 126.05, 138.05, 144.06, 168.06, 186.07 and 204.08.

**GlcNAc-P11:**

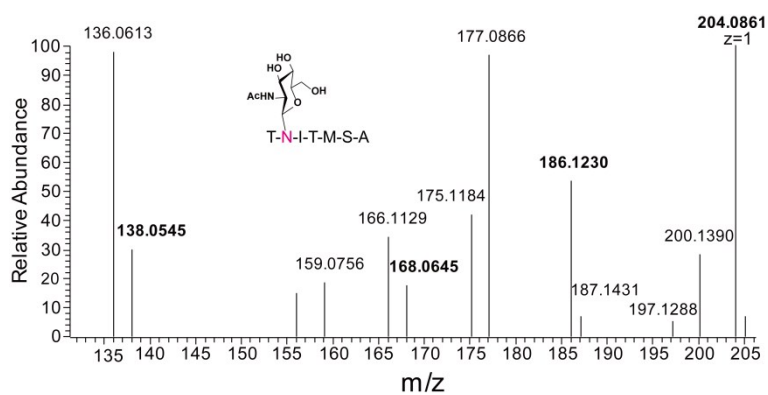

**GlcNAc-P12:**

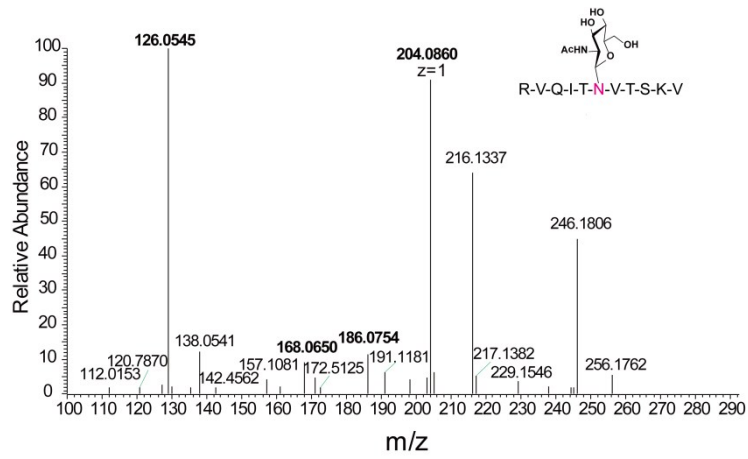

**GlcNAc-P13:**

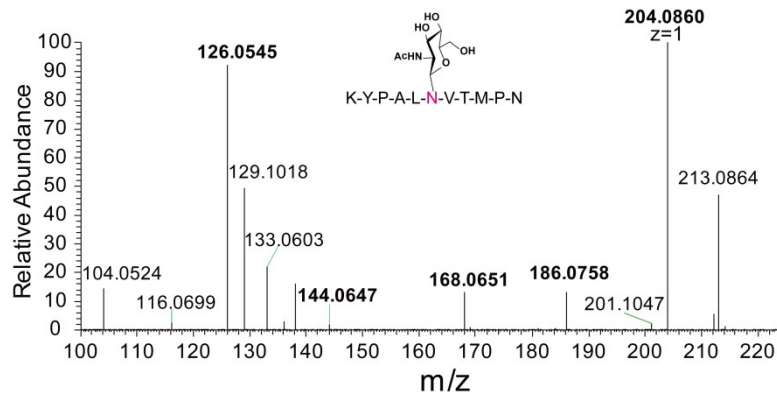

**GlcNAc-P14:**

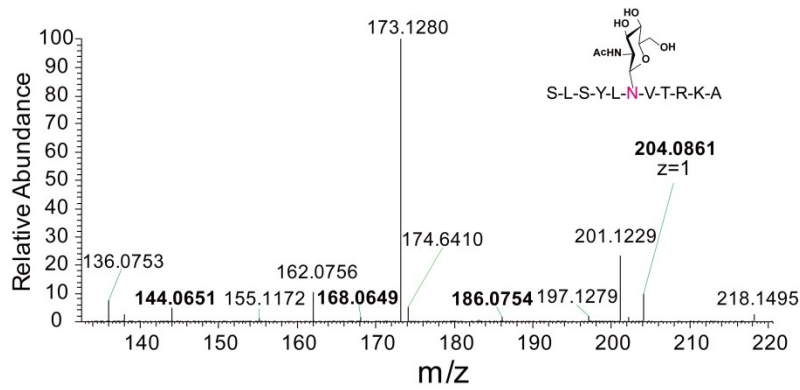

**GlcNAc-P15:**

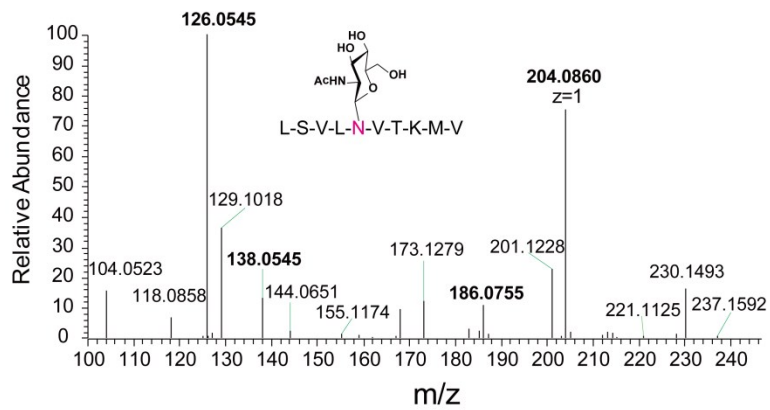

**GlcNAc-P16:**

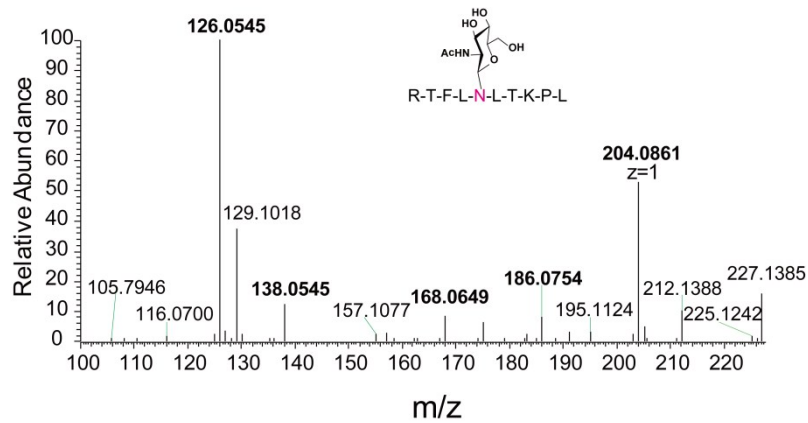

**GlcNAc-P17:**

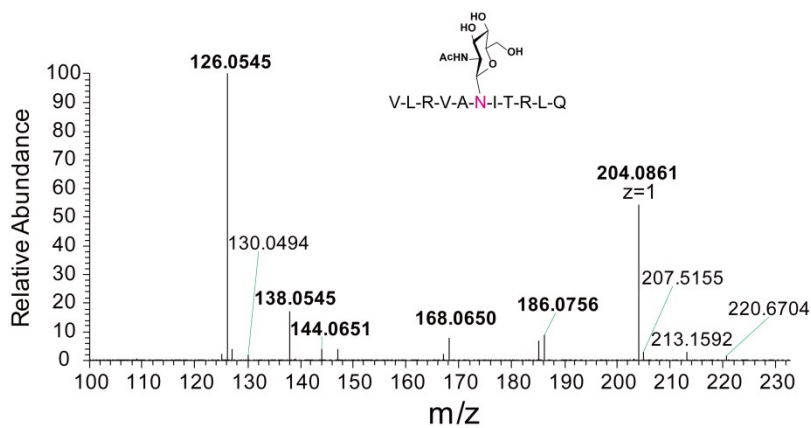

### GlcNAc-P18:

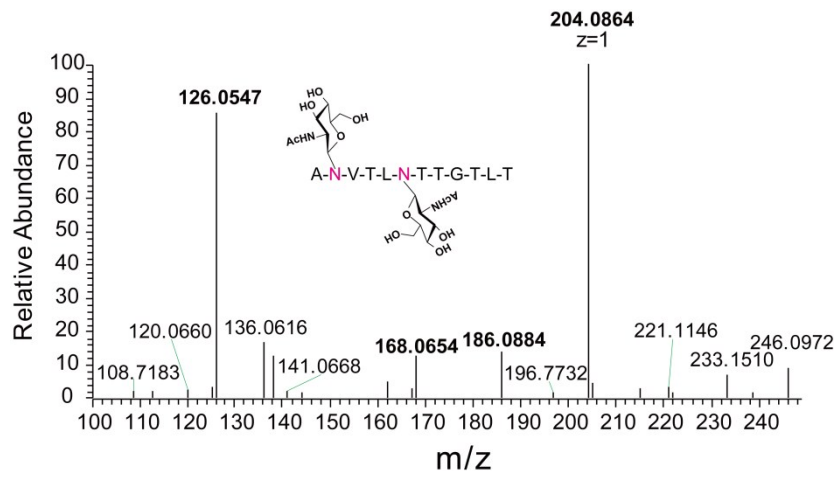

### GlcNAc-P19:

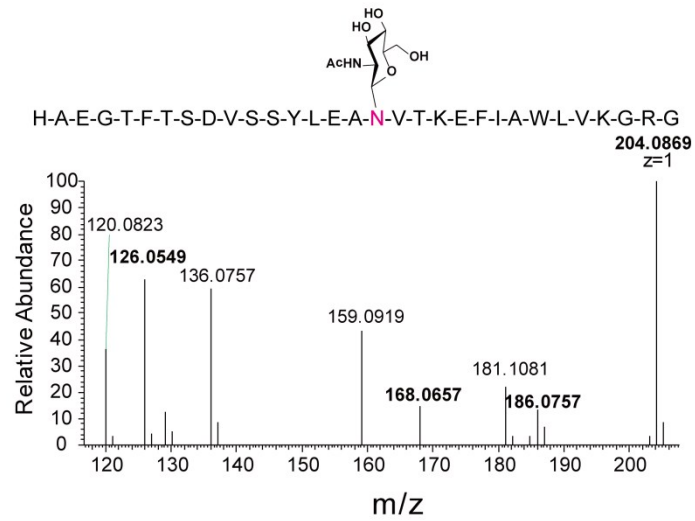



a)

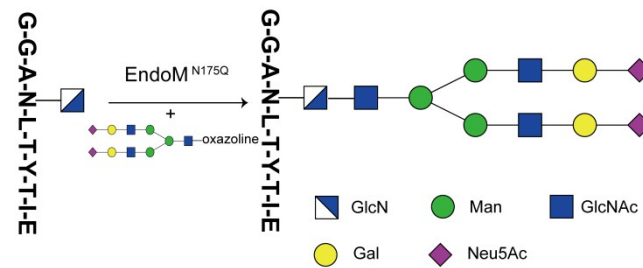

b)

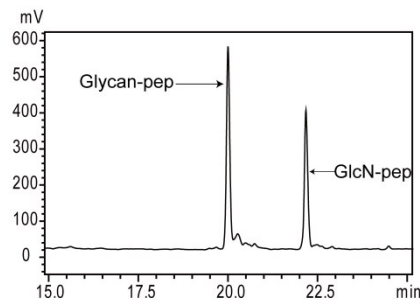

c)

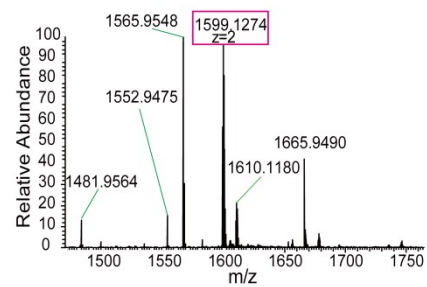

**Fig. S4.** Transglycosylation of GlcN-peptide. a) Scheme of transglycosylation of GlcN-peptide; b) Analytical HPLC monitoring of EndoM<sup>N175Q</sup> catalyzed transglycosylation using the GlcN-peptide as the acceptor substrate; c) ESI-MS profile of desired glycan-peptide with an observed mass of 1599.127,  $z=2$  (calculated:  $M = 3199.2824$ ).

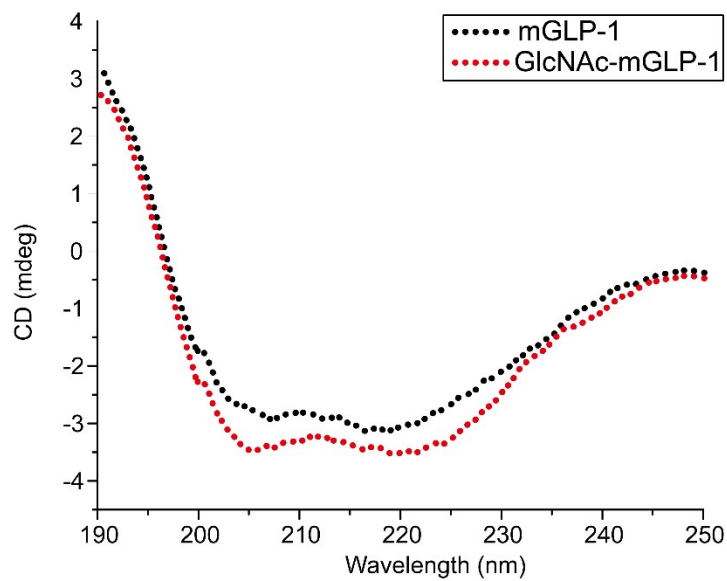

**Fig. S5.** Far-UV CD spectra of mGLP-1 and GlcNAc-mGLP-1.

**Figure S6.** ESI-MS spectra of glycopeptides Glycan-P11~Glycan-P19

**Glycan-P11:** Calculated M = 2942.1183; found ( $m/z$ ):  $[M+3H]^{3+} = 981.3827$ ,  $[M+2H]^{2+} = 1471.5646$ .

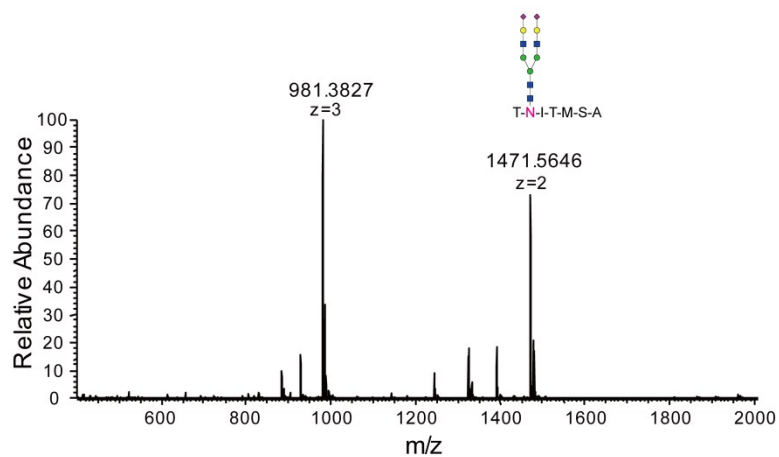

**Glycan-P12:** Calculated M = 3449.5006; found ( $m/z$ ):  $[M+3H]^{3+} = 1150.5071$ .

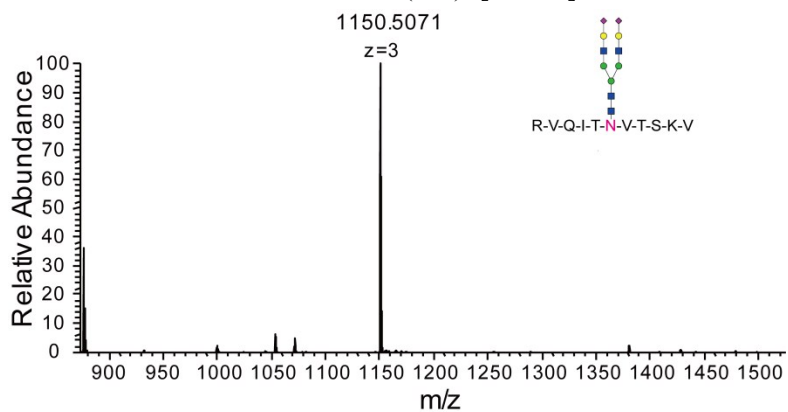

**Glycan-P13:** Calculated M = 3452.4138; found ( $m/z$ ):  $[M+3H]^{3+} = 1151.4854$ .

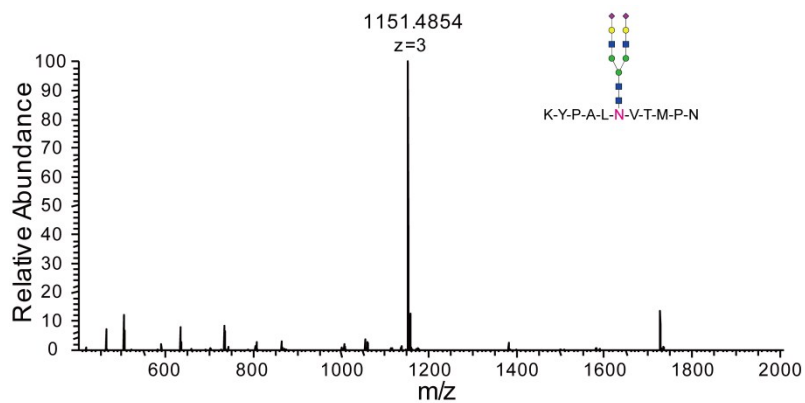

**Glycan-P14:** Calculated M = 3456.4741; found ( $m/z$ ):  $[M+4H]^{4+} = 864.8784$ ,  $[M+3H]^{3+} = 1152.8391$ .

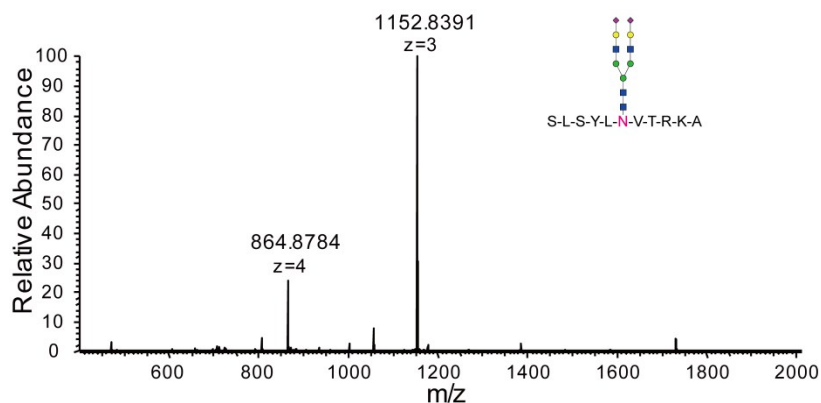

**Glycan-P15:** Calculated M = 3308.4178; found ( $m/z$ ):  $[M+3H]^{3+} = 1103.4872$ ,  $[M+2H]^{2+} = 1654.7135$ .

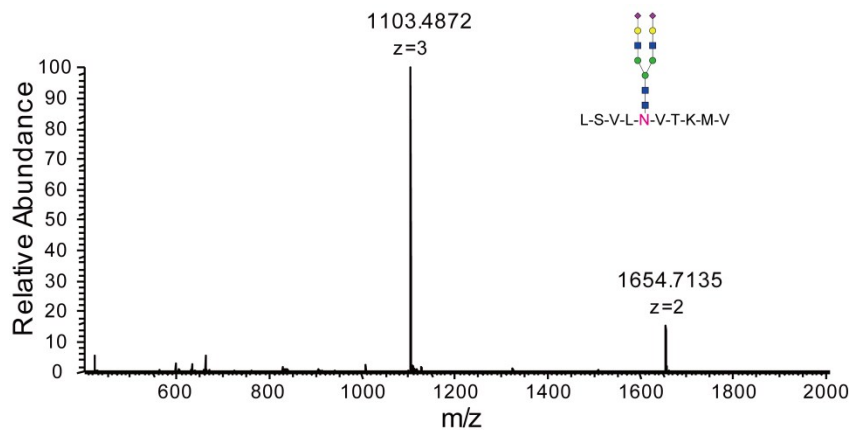

**Glycan-P16:** Calculated M = 3406.4907; found ( $m/z$ ):  $[M+4H]^{4+} = 852.6319$ ,  $[M+3H]^{3+} = 1136.5124$ ,  $[M+2H]^{2+} = 1704.2498$ .

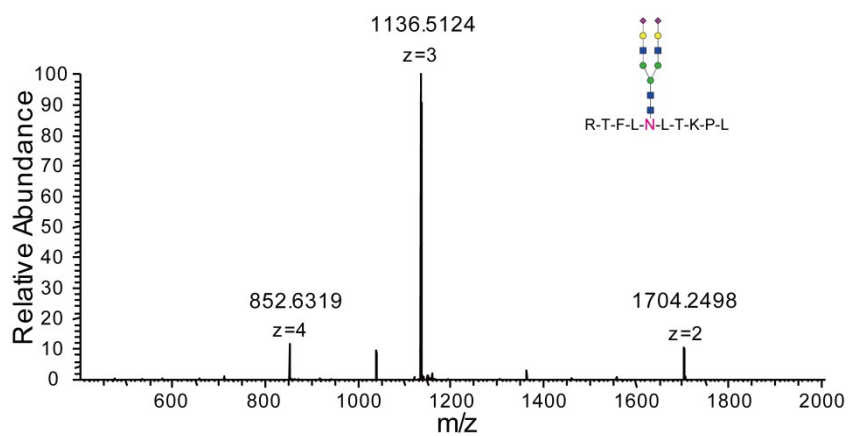

**Glycan-P17:** Calculated M = 3486.5605; found ( $m/z$ ):  $[M+4H]^{4+} = 872.6508$ ,  $[M+3H]^{3+} = 1163.2027$ ,  $[M+2H]^{2+} = 1744.2829$ .

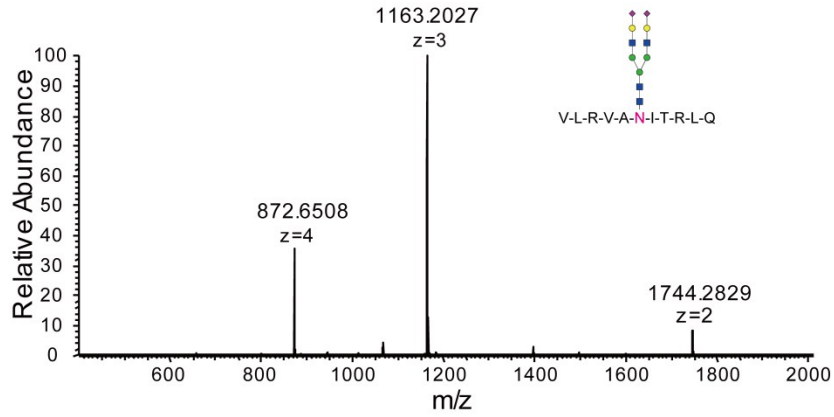

**diGlycan-P18:** Calculated M = 5616.1815; found ( $m/z$ ):  $[M+4H]^{4+} = 1405.3071$ .

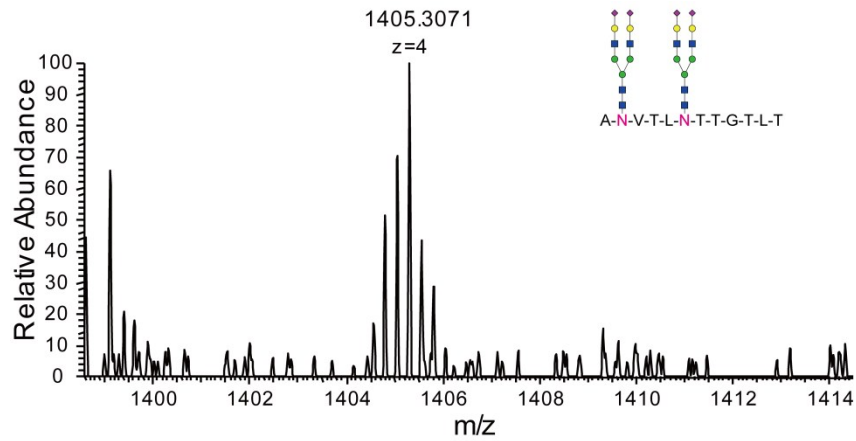

**Glycan-P19:** Calculated M = 5616.4824; found ( $m/z$ ):  $[M+4H]^{4+} = 1405.1262$ .

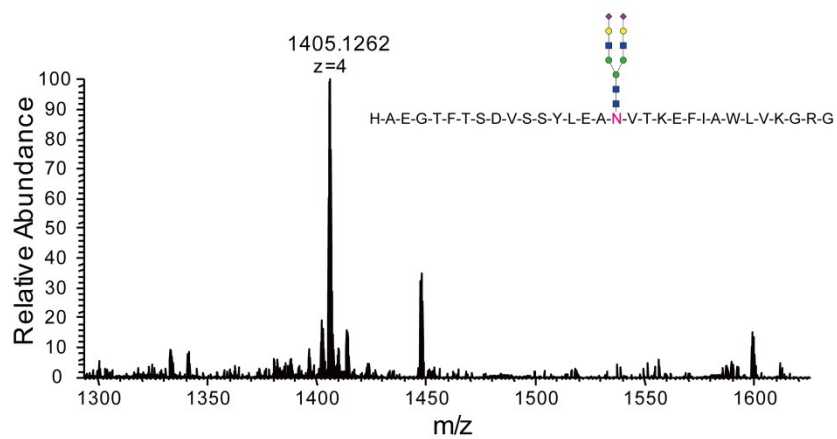



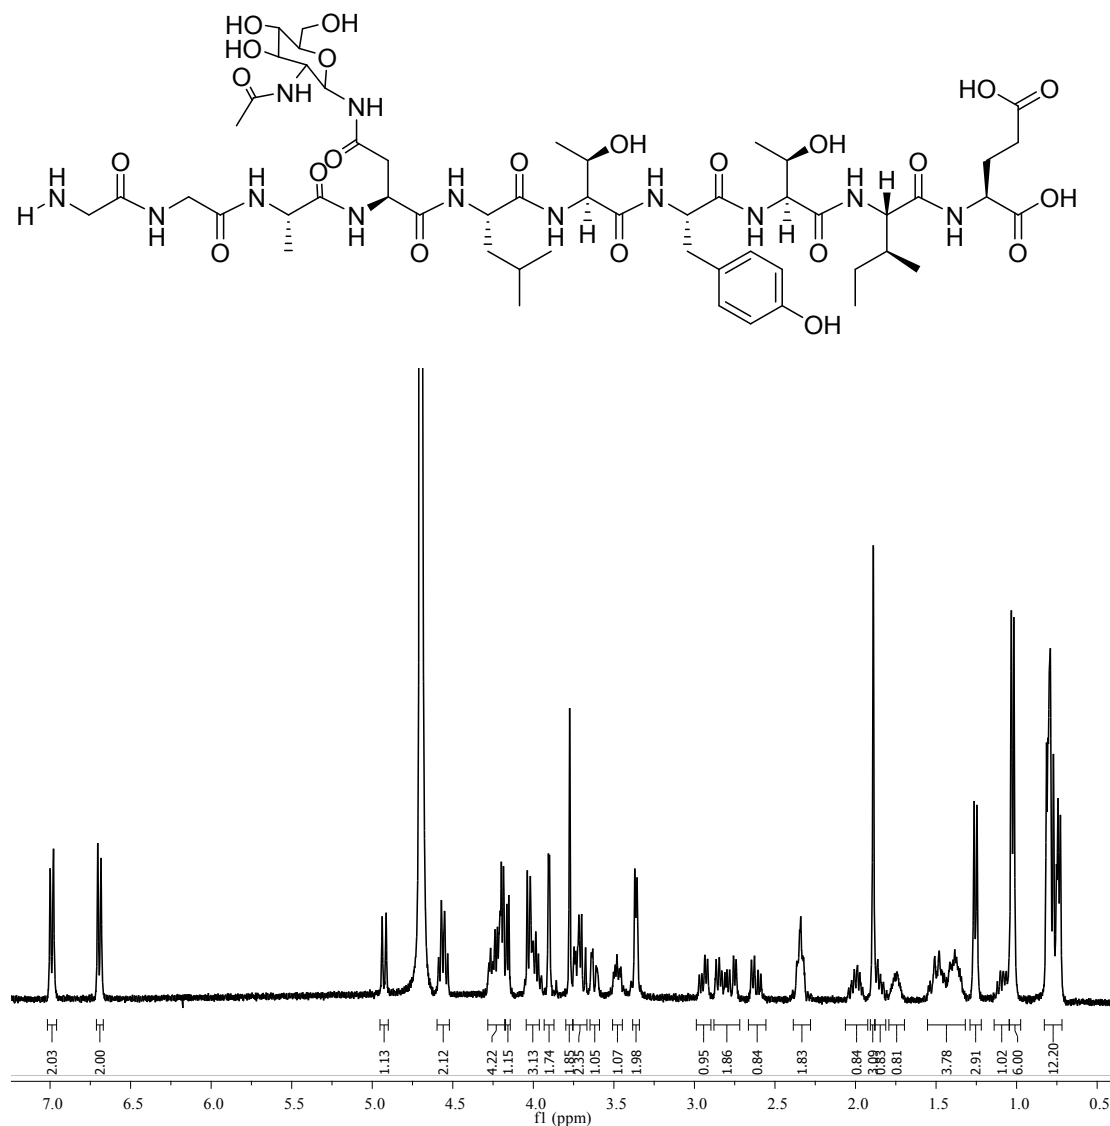

**Figure S8.** <sup>1</sup>H NMR spectra of GGAN(GlcNAc)LTYTIE.

## Reference

1. M. M. Muthana, J. Qu, Y. Li, L. Zhang, H. Yu, L. Ding, H. Malekan and X. Chen, *Chem. Commun.*, 2012, **48**, 2728-2730.
2. Y. Zou, M. Xue, W. Wang, L. Cai, L. Chen, J. Liu, P. G. Wang, J. Shen and M. Chen, *Carbohydr. Res.*, 2013, **373**, 76-81.
3. C. Ma, Q. Zhang, J. Qu, X. Zhao, X. Li, Y. Liu and P. G. Wang, *J. Proteomics*, 2015, **114**, 61-70.
